# Supplementary material for: Oct4-mediated reprogramming induces embryonic-like microRNA expression signatures in human fibroblasts
Source: PubMed Central journal article supplement (PMC6823439; doi:10.1038/s41598-019-52294-3), 2019-10-31
Supplement: 41598_2019_52294_MOESM1_ESM.pdf [file 41598_2019_52294_MOESM1_ESM.pdf]

# Supplementary information file

## **Manuscript: Oct4-mediated reprogramming induces embryonic-like microRNA expression signatures in human fibroblasts**

Lucie Peskova<sup>1</sup>, Katerina Cerna<sup>2</sup>, Jan Oppelt<sup>2,4</sup>, Marek Mraz<sup>2,3</sup>, Tomas Barta<sup>1\*</sup>

- 1) Department of Histology and Embryology, Faculty of Medicine, Masaryk University, Brno 625 00, Czech Republic
- 2) CEITEC-Central European Institute of Technology, Masaryk University, Brno 625 00, Czech Republic
- 3) Department of Internal Medicine, Hematology and Oncology, University Hospital Brno and Faculty of Medicine, Masaryk University, Brno, Czech Republic
- 4) National Centre for Biomolecular Research, Faculty of Science, Masaryk University, Brno 625 00, Czech Republic

Supplementary Figure 1 (Peskova et al.)

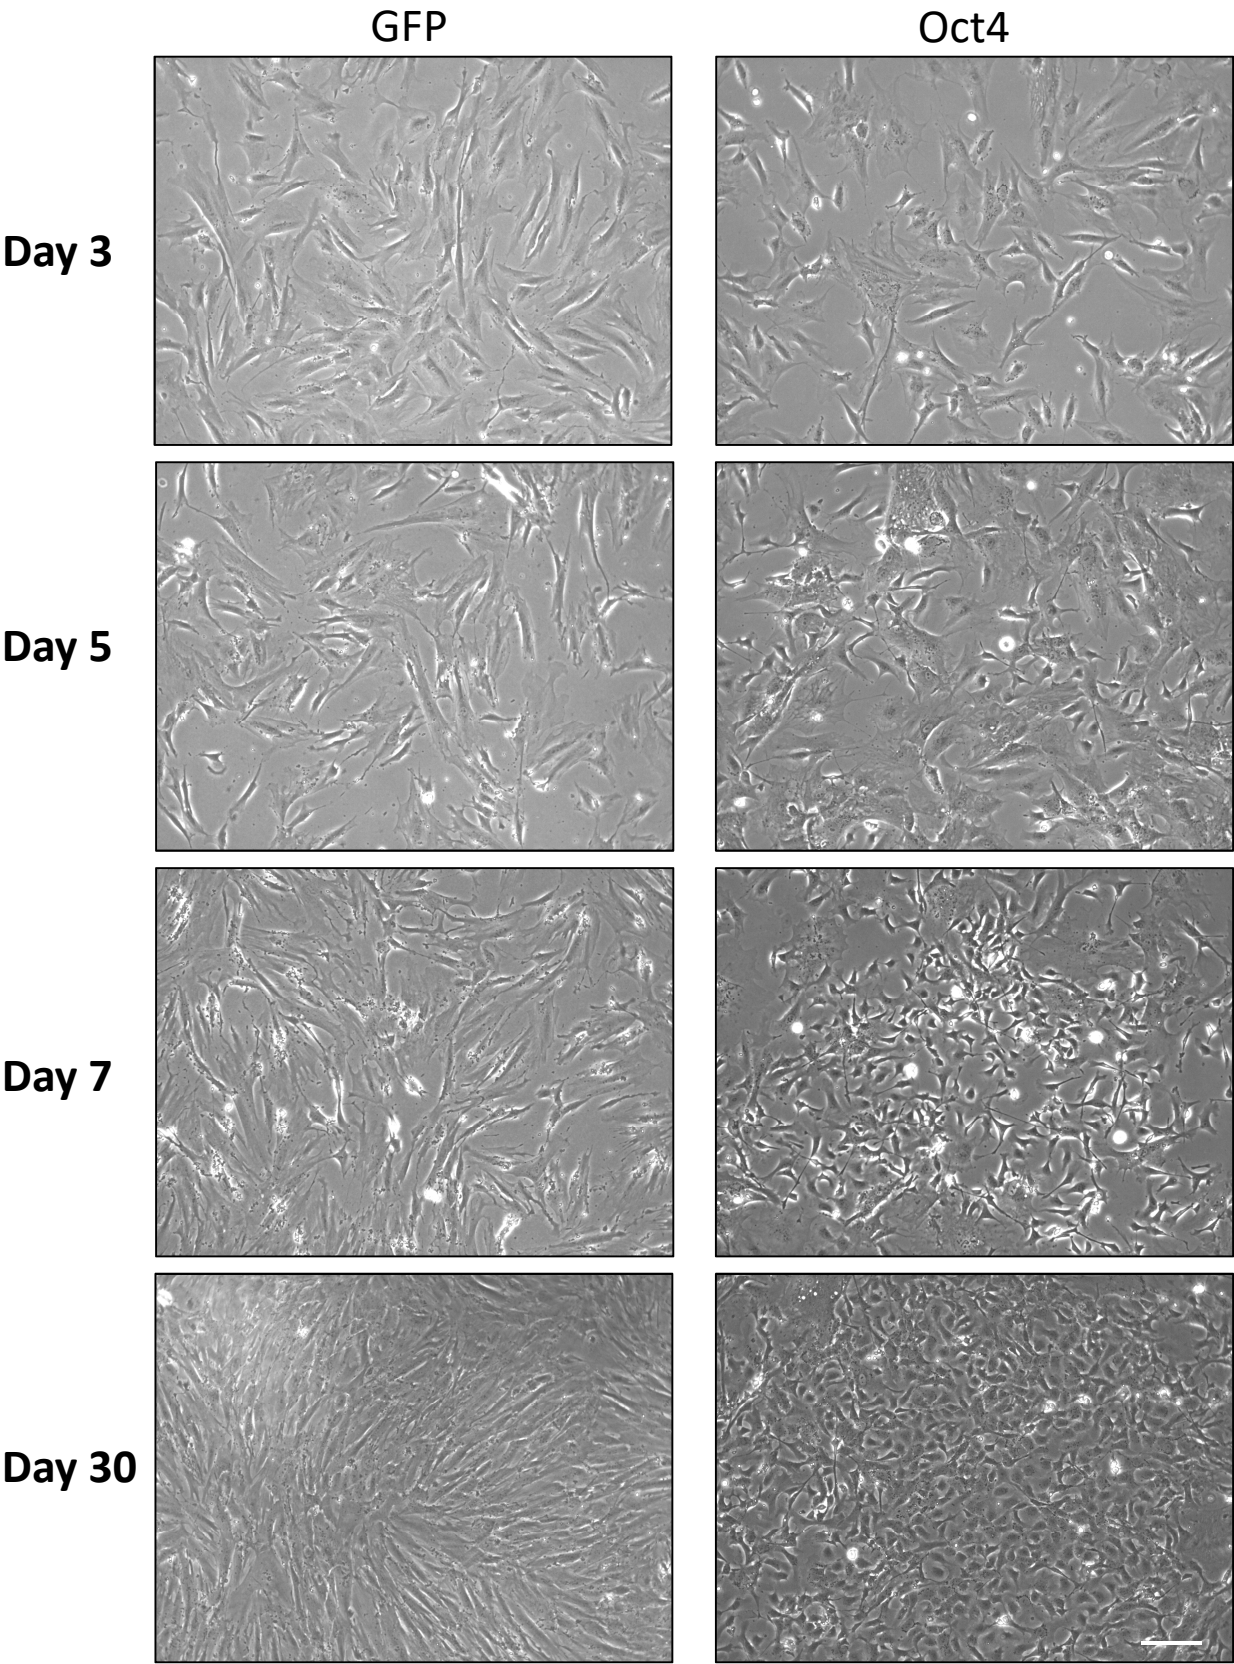

**Supplementary Figure S1:** Morphology of hDFs expressing GFP (control) or Oct4, as determined by bright field microscopy. Scale bar = 100  $\mu$ m.

## Supplementary Figure 2 (Peskova et al.)

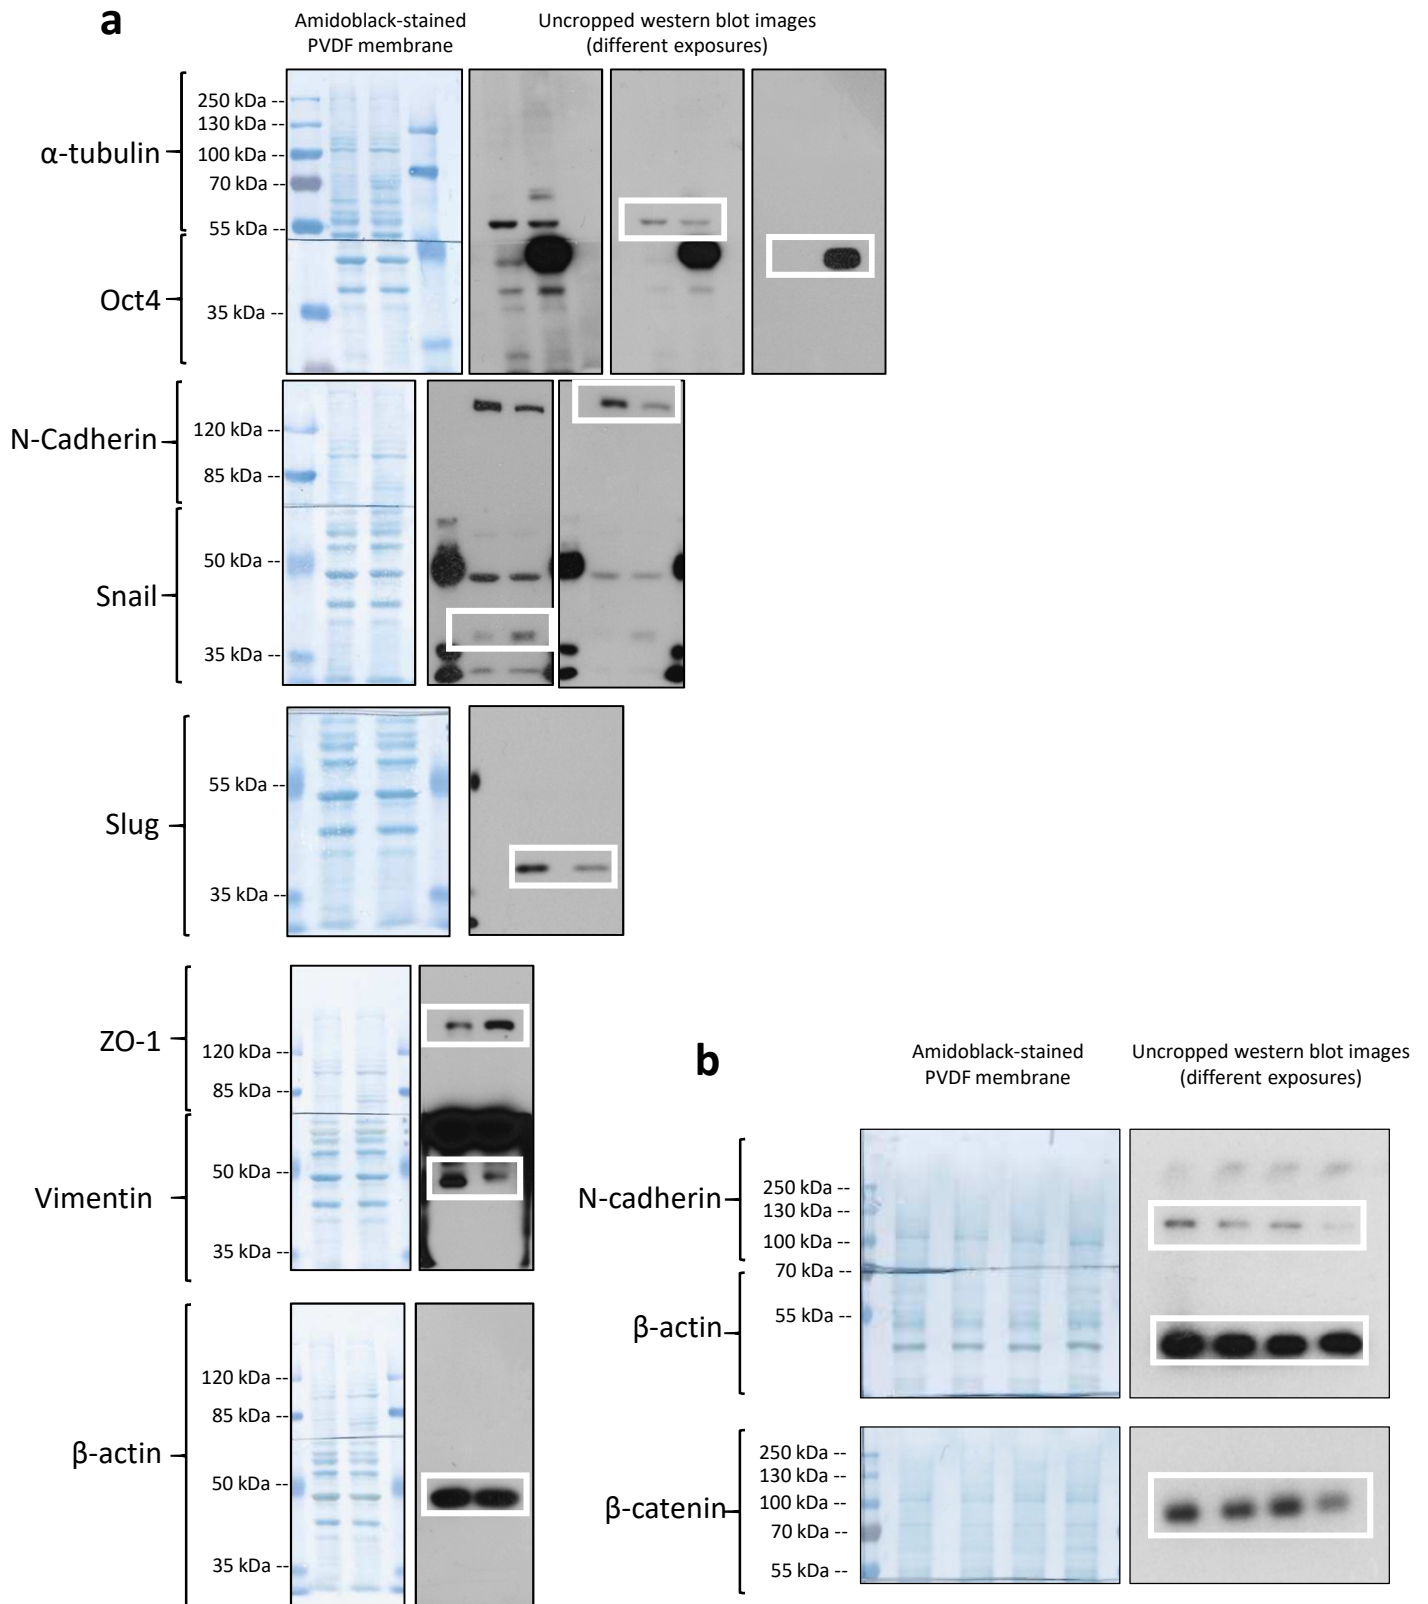

**Supplementary Figure S2:** (a) Western blot analysis of mesenchymal/epithelial markers and Oct4 expression in control GFP+ hDFs and Oct4+ hDFs 6 days post transduction.  $\alpha$ -tubulin and  $\beta$ -actin were used as a loading control. Full-scan of western blot images presented in the Figure 1c with molecular weight marker indicated. Corresponding fragments of blot (white rectangles) used in the Figure 1c are indicated. (b) Western blot analysis of N-cadherin and  $\beta$ -catenin expression in hDFs over-expressing mir-302 cluster.  $\beta$ -actin was used as a loading control. Full-scan of western blot images presented in the Figure 7c with molecular weight marker indicated. Corresponding fragments of blot (white rectangles) used in the Figure 7c are indicated.

Supplementary Figure 3 (Peskova et al.)

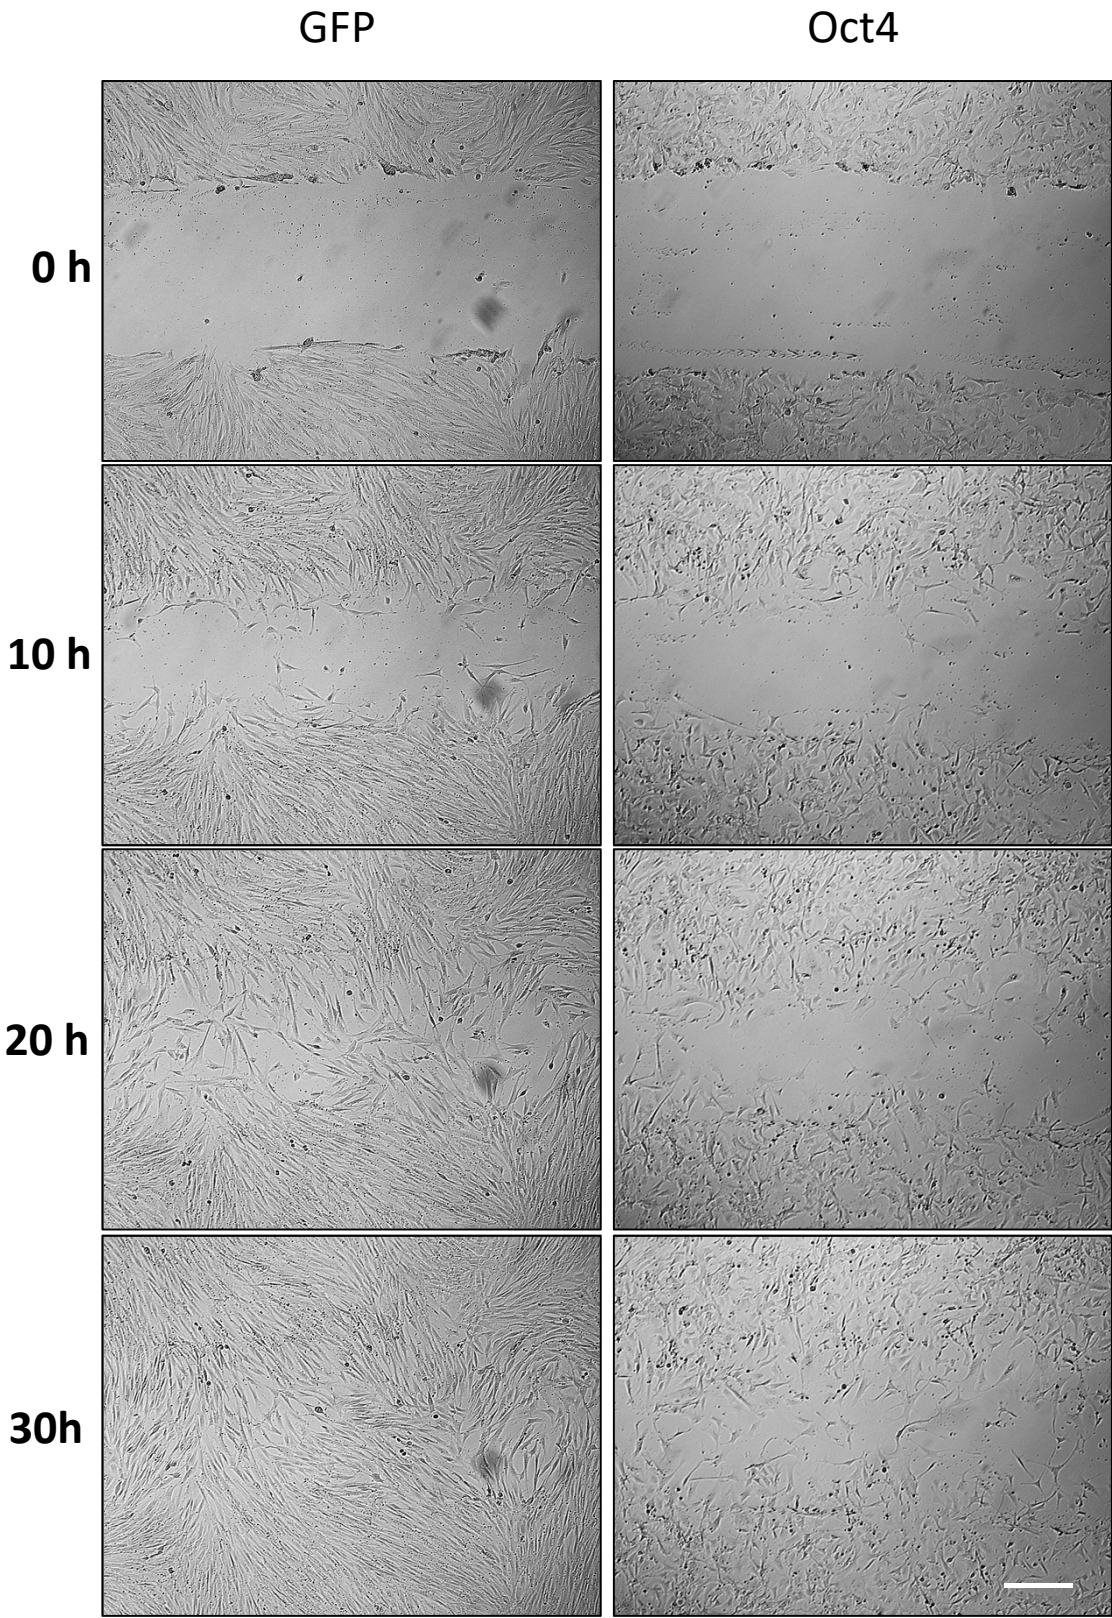

**Supplementary Figure S3:** Assessment of hDFs migration upon over-expression of GFP (control) or Oct4, as determined by time-lapse bright field microscopy. Scale bar = 100  $\mu$ m.



Supplementary Figure 4 (Peskova et al.)

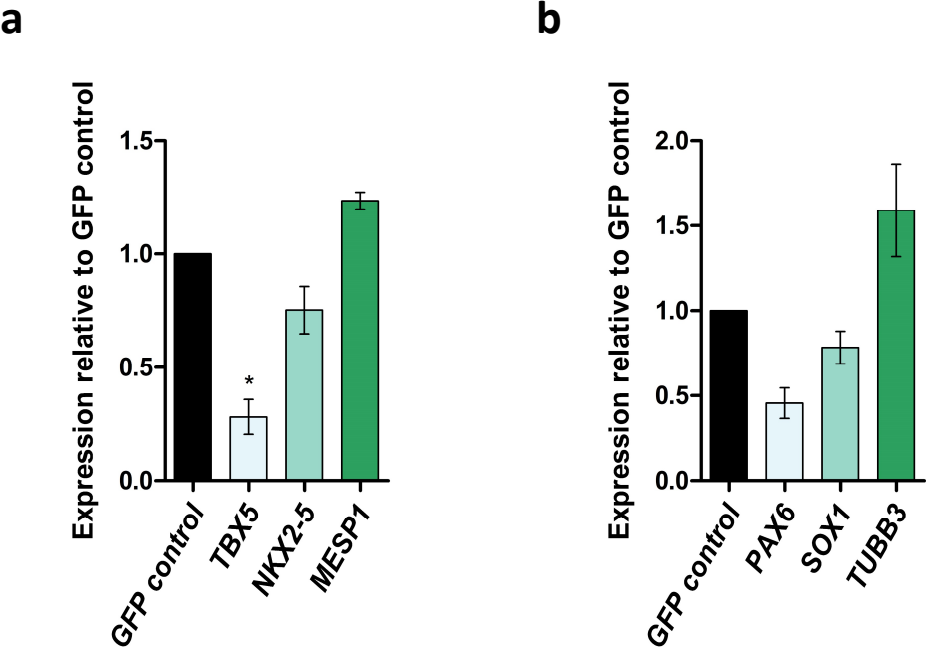

**Supplementary Figure S4:** Expression levels of a) *TBX5*, *NKX2-5*, *MESP1* and b) *PAX6*, *SOX1*, *TUBB3* upon Oct4 over-expression in hDFs, as determined using RT-qPCR.

# Supplementary Figure 5 (Peskova et al.)

**a** Number of reads

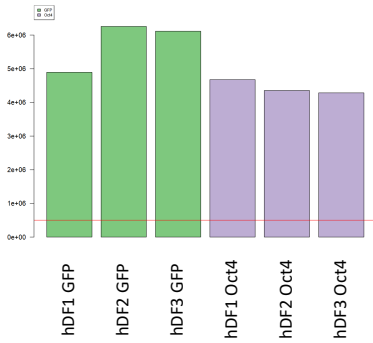

**b** Cook's distance

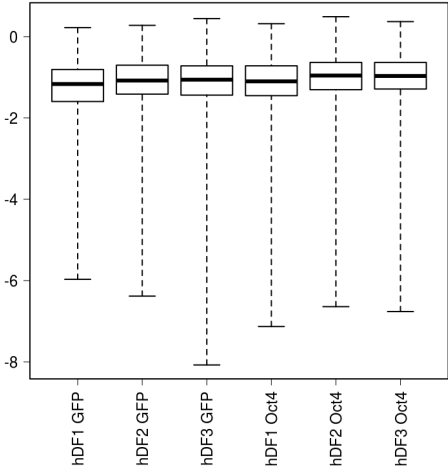

**Supplementary Figure S5: NGS quality check. (a)** Number of raw reads in individual samples. **(b)** Cook's distance of individual samples

## Supplementary Figure 6 (Peskova et al.)

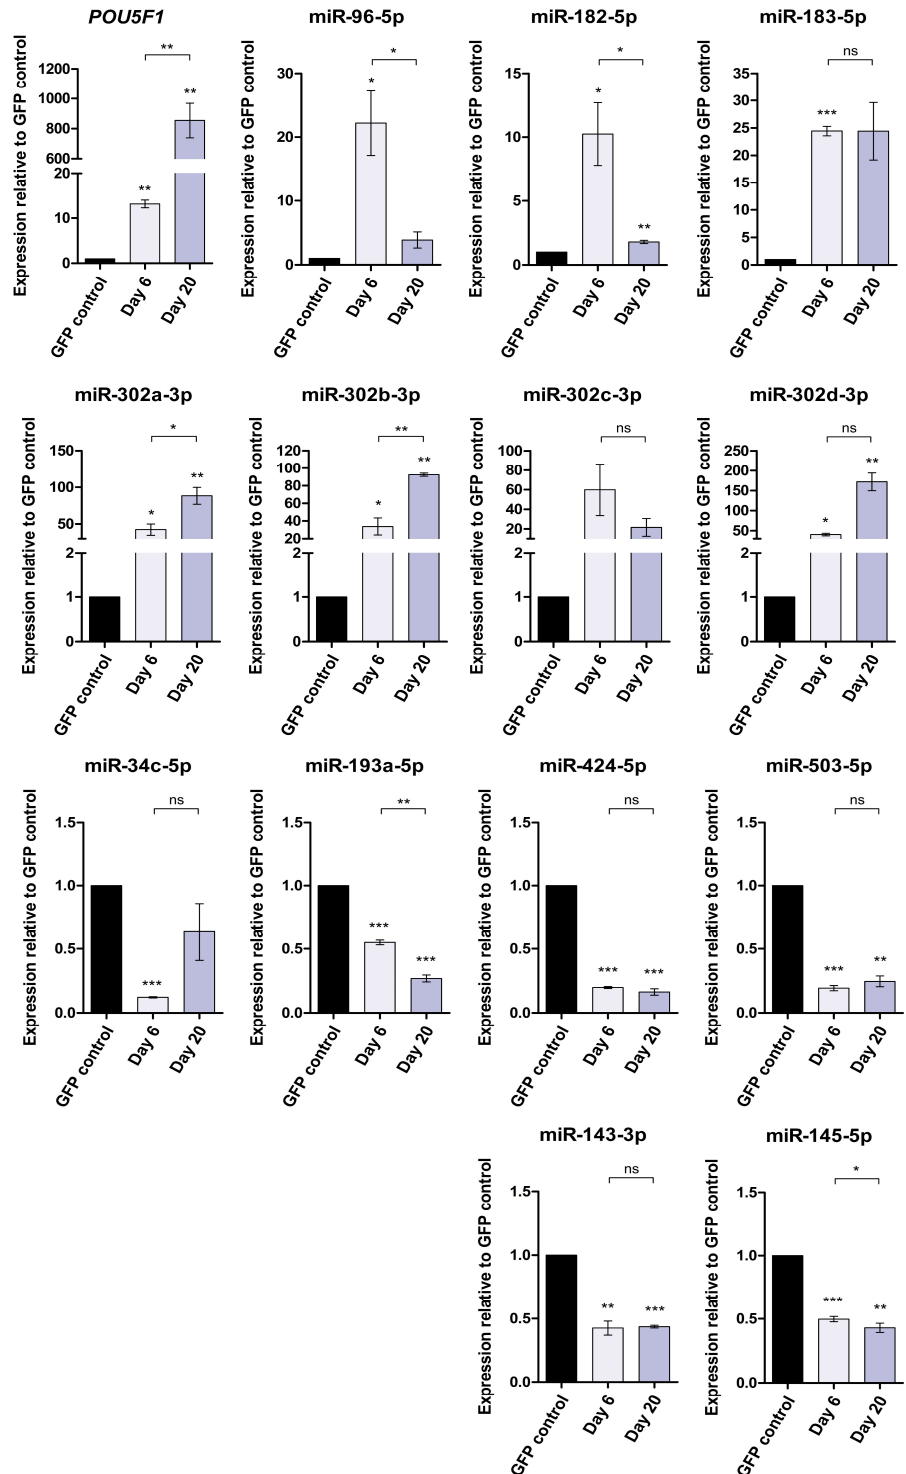

**Supplementary Figure S6:** Expression levels of *POU5F1* (Oct4) and selected miRNAs that are differentially expressed based on NGS data, as determined by RT-qPCR at day 6 and 20 upon transduction. The results are shown as expression relative to corresponding control GFP+ hDFs. Error bars represent  $\pm$  SD.

## Supplementary Figure 7 (Peskova et al.)

| Primer                                                                   | Sequence                  |
|--------------------------------------------------------------------------|---------------------------|
| <i>GAPDH-Left</i>                                                        | AGCCACATCGCTCAGACAC       |
| <i>GAPDH Right</i>                                                       | GCCCAATACGACCAAATCC       |
| <i>SNAI2 Left</i>                                                        | TGGTTGCTTCAAGGACACAT      |
| <i>SNAI2 Right</i>                                                       | GCAAATGCTCTGTTGCAGTG      |
| <i>POU5F1 Left</i>                                                       | GAAACCCACACTGCAGATCA      |
| <i>POU5F1 Right</i>                                                      | CGGTTACAGAACCACACTCG      |
| <i>COL1A1 Left</i>                                                       | CCCAAGGCTTCCAAGGTC        |
| <i>COL1A1 Right</i>                                                      | GGACGACCAGGTTTTCCAG       |
| <i>CDH1 Left</i>                                                         | TGGAGGAATTCTTGCTTTGC      |
| <i>CDH1 Right</i>                                                        | CGCTCTCTCCGAAGAAAC        |
| <i>EPCAM Left</i>                                                        | CCATGTGCTGGTGTGTGAA       |
| <i>EPCAM Right</i>                                                       | TGTGTTTTAGTTCAATGATGATCCA |
| <i>CRB3 Left</i>                                                         | GCACTGTTTTGCCTTCATCC      |
| <i>CRB3 Right</i>                                                        | AGCAGTGATGGCTTCTGGAC      |
| <i>PAX6 Left</i>                                                         | GCACACACACATTAACACACTTG   |
| <i>PAX6 Right</i>                                                        | GGTGTGTGAGAGCAATTCTCAG    |
| <i>SOX1 Left</i>                                                         | TCCCCGCGTGAAGT            |
| <i>SOX1 Right</i>                                                        | CAAGGCATTTTGCGTTTACA      |
| <b>TUBB3: QUANTITECT® PRIMER ASSAY HS_TUBB3_1_SG CAT.NO.: QT00083713</b> |                           |
| <i>NKX2-5 Left</i>                                                       | CACCTCAACAGCTCCCTGA       |
| <i>NKX2-5 Right</i>                                                      | CTAGGTCTCCGAGGAGTGA       |
| <i>TBX5 Left</i>                                                         | CCAGGAGCATAGCCAAATTTAC    |
| <i>TBX5 Right</i>                                                        | AGGGCTTCTTATAGGGATGGTC    |
| <i>MESP1 Left</i>                                                        | CACTTTGAGGCAAGCAGGA       |
| <i>MESP1 Right</i>                                                       | GCCAACTGACACCAGTACAGTTTA  |

**Supplementary Figure S7:** The list of primers and their sequences used in this study.

Supplementary Figure 8 (Peskova et al.)

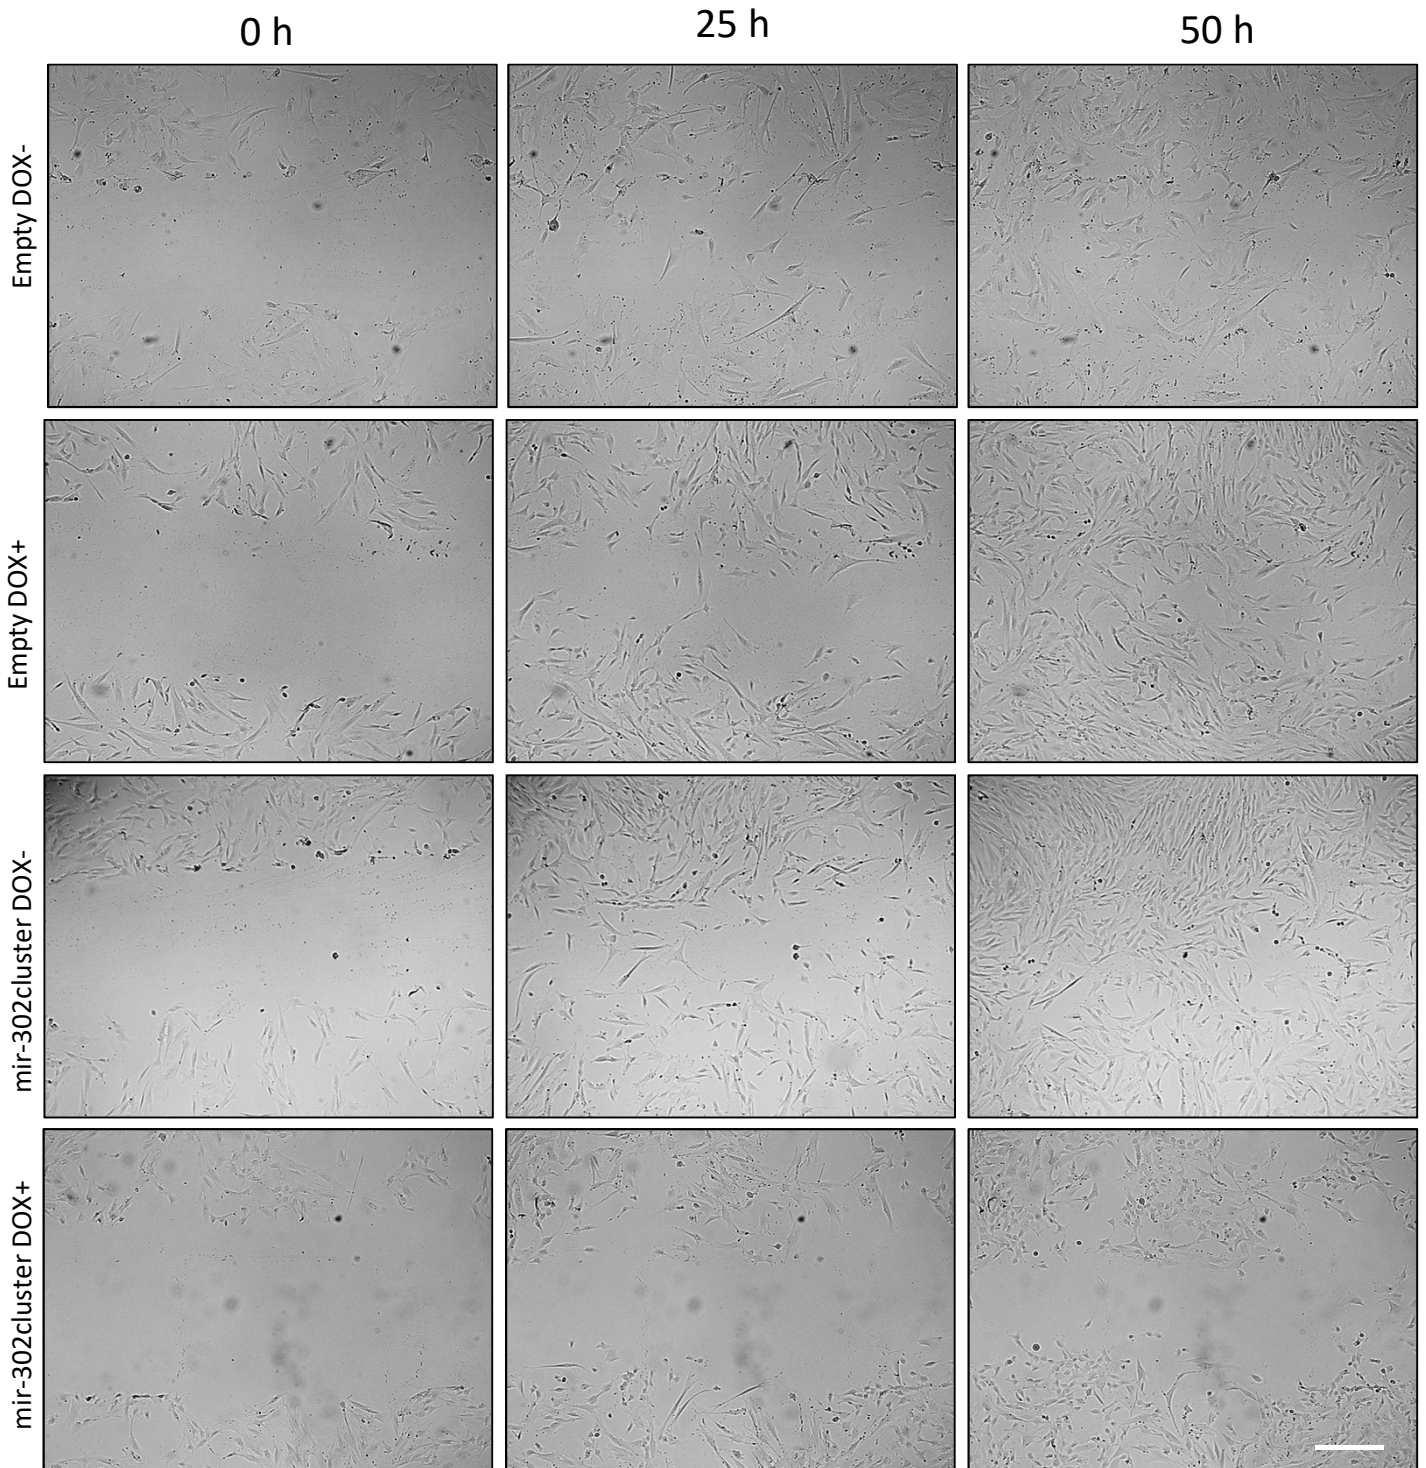

**Supplementary Figure S8:** Assessment of hDFs migration upon mir-302 cluster over-expression, as determined by time-lapse bright field microscopy. Cells expressing empty vector and the presence or absence of Doxycycline represent a control. Scale bar = 100  $\mu$ m.
